# Supplementary material for: Reanalyzing the spatial representativeness of snow depth at automated monitoring stations using airborne Lidar data
Source: Copernicus journal article supplement (doi:10.5194/egusphere-2023-2543), 2023-11-20
Supplement: Supplementary file 1 [file egusphere-2023-2543-supplement-version2.zip]

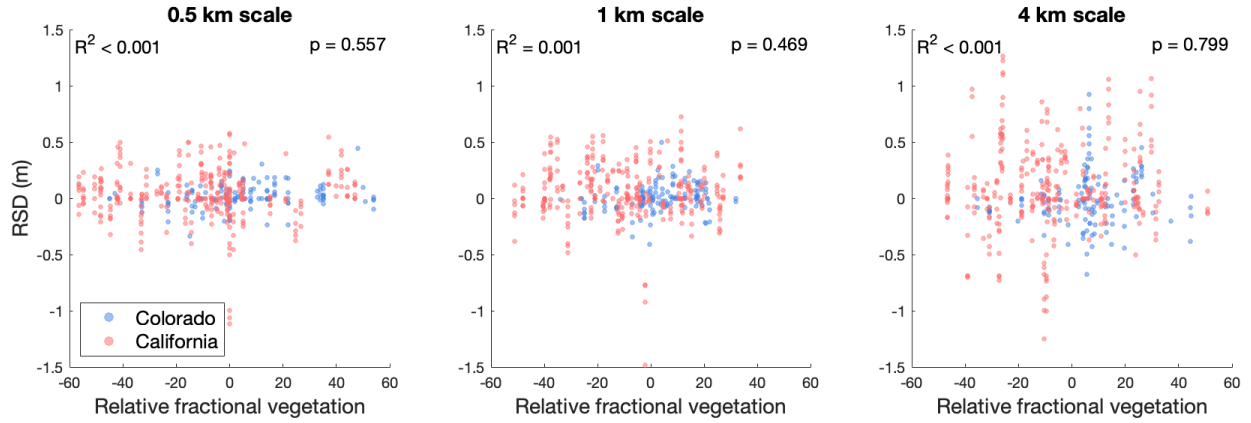

**Supplemental Figure 1. Scatter plots showing the relationship between relative fractional vegetation and relative snow depth at the three spatial scales using 50 m SD data to represent the point value. The relationships are insignificant at all three scales.**

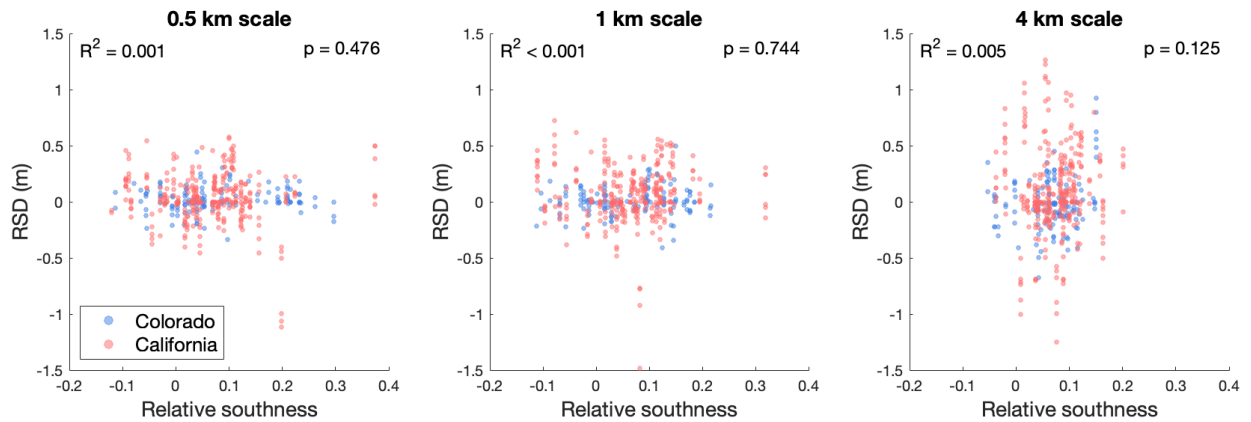

**Supplemental Figure 2. Scatter plots showing the relationship between relative southness and relative snow depth at the three spatial scales using 50 m SD data to represent the point value. The relationships are insignificant at all three scales.**
