# Supplementary material for: Reanalyzing the spatial representativeness of snow depth at automated monitoring stations using airborne Lidar data
Source: Copernicus journal article supplement (doi:10.5194/egusphere-2023-2543), 2023-11-20
Supplement: Supplementary file 2 [file Herbert_supplemental_tables.xlsx]

## Sheet: Supp_Table_1
	Supplemental Table 1. Location data for each Colorado snow station used in this investigation. Lidar Survey dates are shown for each instance where coincident Lidar-snow station data were used at a site. Green text represents sites where the coordinates were updated using Google Earth imagery.
	Basin	Snow Station	Latitude	Longitude	Elevation (m)	Survey Dates
						2021		2022		2023
	Animas	Cascade 2	37.6575	-107.803	2746.86	2021-04-19 12:00:00	2021-05-15 12:00:00
		Cascade	37.6508	-107.81	2719	2021-04-19 12:00:00	2021-05-15 12:00:00
		Mineral Creek	37.8474	-107.727	3062.02	2021-04-19 12:00:00	2021-05-15 12:00:00
		Molas Lake	37.7493	-107.689	3240.33	2021-04-19 12:00:00	2021-05-15 12:00:00
		Red Mountain Pass	37.8917	-107.714	3377.18	2021-04-19 12:00:00	2021-05-15 12:00:00
		Spud Mountain	37.6988	-107.778	3253.44	2021-04-19 12:00:00	2021-05-15 12:00:00
	Blue River	Copper Mountain	39.4892	-106.172	3207.41	2021-04-18 12:00:00	2021-05-24 12:00:00	2022-04-19 12:00:00	2023-04-16 12:00:00	2023-05-29 12:00:00
		Fremont Pass	39.3801	-106.198	3452.16	2021-04-18 12:00:00	2021-05-24 12:00:00	2022-04-19 12:00:00	2022-05-26 12:00:00	2023-04-16 12:00:00	2023-05-29 12:00:00
		Grizzly Peak	39.6465	-105.869	3395.17	2021-04-18 12:00:00	2021-05-24 12:00:00	2022-04-19 12:00:00	2022-05-26 12:00:00	2023-04-16 12:00:00	2023-05-29 12:00:00
		Hoosier Pass	39.3609	-106.06	3539.03	2021-04-18 12:00:00	2021-05-24 12:00:00	2022-04-19 12:00:00	2022-05-26 12:00:00	2023-04-16 12:00:00	2023-05-29 12:00:00
	Boulder Creek	Lake Eldora	39.9366	-105.59	2965.09					2023-05-09 12:00:00
		Niwot	40.0358	-105.545	3041.6					2023-05-09 12:00:00
		University Camp	40.0331	-105.576	3157.73					2023-05-09 12:00:00
	Clear Creek	Berthoud Summit	39.8036	-105.778	3448.51					2023-05-09 12:00:00
		Echo Lake	39.6554	-105.594	3259.53					2023-05-09 12:00:00
		Loveland Basin	39.6743	-105.903	3482.95					2023-05-09 12:00:00
	Dolores	Black Mesa	37.7897	-108.184	3524.71	2021-04-21 12:00:00	2021-05-14 12:00:00	2022-04-15 12:00:00	2022-05-10 12:00:00	2023-04-06 12:00:00	2023-05-25 12:00:00
		El Diente Peak	37.7861	-108.022	3114.14	2021-04-21 12:00:00	2021-05-14 12:00:00	2022-04-15 12:00:00	2022-05-10 12:00:00	2023-04-06 12:00:00	2023-05-25 12:00:00
		Lizard Head Pass	37.7989	-107.925	3106.83	2021-04-21 12:00:00	2021-05-14 12:00:00	2022-04-15 12:00:00	2022-05-10 12:00:00	2023-04-06 12:00:00	2023-05-25 12:00:00
		Scotch Creek	37.6456	-108.008	2802.64	2021-04-21 12:00:00	2021-05-14 12:00:00	2022-04-15 12:00:00	2022-05-10 12:00:00	2023-04-06 12:00:00	2023-05-25 12:00:00
		Sharkstooth	37.5036	-108.114	3275.69	2021-04-21 12:00:00	2021-05-14 12:00:00	2022-04-15 12:00:00	2022-05-10 12:00:00	2023-04-06 12:00:00	2023-05-25 12:00:00
	East River	Butte	38.8944	-106.953	3108.96			2022-05-18 12:00:00	2022-04-21 12:00:00	2023-04-01 12:00:00	2023-05-23 12:00:00
		Schofield Pass	39.0147	-107.049	3247.03			2022-05-18 12:00:00	2022-04-21 12:00:00	2023-04-01 12:00:00	2023-05-23 12:00:00
	Poudre	Hourglass Lake	40.5772	-105.626	2870.3					2023-05-22 12:00:00
		Joe Wright	40.5329	-105.887	3096.16					2023-05-22 12:00:00
		Long Draw Resv	40.5115	-105.765	3050.44					2023-05-22 12:00:00
	Roaring Fork	Chapman Tunnel	39.2621	-106.629	3078.48					2023-04-11 12:00:00	2023-05-28 12:00:00
		Independence Pass	39.0754	-106.612	3230.27					2023-04-11 12:00:00	2023-05-28 12:00:00
		Ivanhoe	39.2923	-106.549	3212.9					2023-04-11 12:00:00	2023-05-28 12:00:00
		Kiln	39.3172	-106.615	2933.4					2023-04-11 12:00:00	2023-05-28 12:00:00
		Nast Lake	39.297	-106.608	2661.21					2023-04-11 12:00:00	2023-05-28 12:00:00
	South Platte	Buckskin Joe	39.3038	-106.113	3403.4					2023-04-16 12:00:00	2023-05-26 12:00:00
		Hoosier Pass	39.3609	-106.06	3539.03					2023-04-16 12:00:00	2023-05-26 12:00:00
		Jackwhacker Gulch	39.571	-105.804	3369.26					2023-04-16 12:00:00	2023-05-26 12:00:00
		Michigan Creek	39.4358	-105.911	3261.97					2023-04-16 12:00:00	2023-05-26 12:00:00
		Rough And Tumble	39.0261	-106.081	3179.67					2023-04-16 12:00:00	2023-05-26 12:00:00
	St Vrain Lefthand	Copeland Lake	40.2073	-105.57	2607.56					2023-05-21 12:00:00
		Sawtooth	40.1363	-105.585	2949.24					2023-05-21 12:00:00
		Wild Basin	40.201	-105.603	2877.01					2023-05-21 12:00:00
	Taylor	Park Cone	38.8198	-106.59	2932.48			2022-04-21 12:00:00		2023-04-01 12:00:00
		Upper Taylor	38.9907	-106.745	3266.54			2022-04-21 12:00:00		2023-04-01 12:00:00	2023-05-23 12:00:00
	Thompson	Bear Lake	40.3118	-105.647	2902.31					2023-05-21 12:00:00
		Willow Park	40.434	-105.736	3271.11					2023-05-21 12:00:00
	Windy Gap	Berthoud Summit	39.8036	-105.778	3448.51			2022-04-18 12:00:00	2022-05-26 12:00:00	2023-04-16 12:00:00	2023-05-27 12:00:00
		Fool Creek	39.8687	-105.868	3400.35					2023-04-16 12:00:00	2023-05-27 12:00:00
		High Lonesome	40.0359	-105.755	3242.46			2022-04-18 12:00:00	2022-05-26 12:00:00	2023-04-16 12:00:00	2023-05-27 12:00:00
		Lake Irene	40.4145	-105.819	3255.87			2022-04-18 12:00:00	2022-05-26 12:00:00	2023-04-16 12:00:00	2023-05-27 12:00:00
		Phantom Valley	40.398	-105.846	2756.92			2022-04-18 12:00:00	2022-05-26 12:00:00	2023-04-16 12:00:00	2023-05-27 12:00:00
		Stillwater Creek	40.2255	-105.92	2675			2022-04-18 12:00:00	2022-05-26 12:00:00	2023-04-16 12:00:00	2023-05-27 12:00:00
		Willow Creek Pass	40.3473	-106.095	2902.61			2022-04-18 12:00:00	2022-05-26 12:00:00	2023-04-16 12:00:00	2023-05-27 12:00:00

## Sheet: Supp_Table_2
	Supplemental Table 2. Location data for each California snow station used in this investigation. Lidar Survey dates are shown for each instance where coincident Lidar-snow station data were used at a site. Green text represents sites where the coordinates were updated using Google Earth imagery.
	Basin	Site	Latitude	Longitude	Elevation	Survey Dates
						2021		2022			2023
	American	Blue Canyon	39.2801	-120.709	1609.34						2023-04-14	2023-04-29	2023-06-02
		Caples Lake	38.7109	-120.042	2601.16						2023-04-14	2023-04-29	2023-01-01	2023-06-02
		Carson Pass	38.6927	-120.002	2624.94						2023-04-14	2023-04-29	2023-01-01	2023-06-02
		Greek Store	39.0747	-120.562	1715						2023-04-14	2023-04-29	2023-01-01	2023-06-02
		Huysink	39.2814	-120.53	2192.43						2023-04-14	2023-04-29	2023-01-01	2023-06-02
		Silver Lake	38.6795	-120.118	2788.92						2023-04-14	2023-04-29	2023-01-01	2023-06-02
	Carson	Blue Lakes	38.608	-119.925	2439.92			2022-04-06	2022-05-13		2023-06-07	2023-03-31	2023-05-11
		Burnside Lake	38.7193	-119.895	2359.76			2022-04-06	2022-05-13		2023-06-07	2023-03-31	2023-05-11
		Ebbetts Pass	38.5497	-119.805	2442.36			2022-04-06	2022-05-13		2023-06-07	2023-03-31	2023-05-11
		Forestdale Creek	38.6823	-119.961	2865.12			2022-04-06	2022-05-13		2023-06-07	2023-03-31	2023-05-11
		Horse Meadow	38.8364	-119.888	2439.62			2022-04-06	2022-05-13		2023-06-07	2023-03-31	2023-05-11
		Monitor Pass	38.6683	-119.609	2143.66			2022-04-06	2022-05-13		2023-06-07	2023-03-31	2023-05-11
		Poison Flat	38.5055	-119.626	2065.93			2022-04-06	2022-05-13		2023-06-07	2023-03-31	2023-05-11
		Spratt Creek	38.6663	-119.817	2165.6			2022-04-06	2022-05-13		2023-06-07	2023-03-31	2023-05-11
	Kaweah	Farewell Gap	36.4151	-118.579	1983.94			2022-04-29	2022-03-27
	Kern	Beach Meadows	36.1262	-118.293	2458.82						2023-04-30	2023-02-04	2023-06-03	2023-03-27
		Crabtree Meadow	36.5637	-118.348	2817.57						2023-04-30	2023-02-04	2023-06-03	2023-03-27
		Casa Vieja Meadows	36.198	-118.268	2127.5						2023-02-04	2023-03-27
		Wet Meadows	36.3497	-118.572	2727.96						2023-04-30	2023-02-04	2023-06-03	2023-03-27
	Kings	Blackcap Basin	37.0666	-118.773	2103.12	2021-03-27
		Big Meadows	36.7153	-118.844	2488.08	2021-03-27	2021-05-02	2022-04-25	2022-04-10	2022-05-15
		Blackcap Basin	37.0666	-118.773	2103.12	2021-05-02		2022-04-25	2022-04-10	2022-05-15
		Charlotte Lake	36.7775	-118.426	2542.95	2021-03-27	2021-05-02				2023-04-22	2023-01-24	2023-03-17
		State Lakes	36.9265	-118.573	2365.55	2021-03-27	2021-05-02
		Upper Burnt Corral	37.1835	-118.938	2628.82			2022-04-25	2022-04-10	2022-05-15	2023-04-22	2023-01-24	2023-07-01	2023-03-17	2023-03-01	2023-05-29
	LowerPit	Snow Mountain	40.7788	-121.783	2956.56							2023-04-26	2023-02-12	2023-05-12
	Merced	Gin Flat	37.7669	-119.775	2318	2021-04-29	2021-03-26	2022-04-12	2022-04-28	2022-05-13	2023-01-31	2023-06-09	2023-03-03	2023-03-27	2023-05-16
		Ostrander Lake	37.6366	-119.553	2042.16	2021-04-29	2021-03-26	2022-04-12	2022-04-28	2023-01-31	2023-06-09	2023-03-03	2023-03-27	2023-05-16
		Tenaya Lake	37.8376	-119.45	2551.5	2021-04-29		2022-04-28	2022-05-13
	Sacramento McCloud	Sand Flat	41.3502	-122.247	2331.72							2023-02-10	2023-04-25	2023-02-10	2023-05-16	2023-02-10
	San Joaquin	Chilkoot Meadow	37.4081	-119.492	2927.3	2021-04-01	2021-05-03	2022-04-17	2022-04-30	2022-03-17
		Devil'S Postpile	37.6294	-119.085	1848			2022-04-17	2022-04-30	2022-03-17	2023-04-15	2023-01-23	2023-06-24	2023-03-18	2023-05-24
		Graveyard Meadow	37.4634	-119.293	2147.32	2021-04-01	2021-05-03	2022-04-17	2022-04-30	2022-03-17	2023-01-23	2023-03-18
		Green Mountain	37.5498	-119.233	2191.51			2022-04-17	2022-04-30	2022-03-17	2023-04-15	2023-01-23	2023-06-24	2023-03-18	2023-05-24
		Huntington Lake	37.2274	-119.22	3259.84	2021-04-01	2021-05-03	2022-04-17	2022-04-30	2022-03-17	2023-01-23	2023-05-24
		Kaiser Point	37.2982	-119.103	2987.04	2021-04-01	2021-05-03				2023-04-15	2023-01-23
		Mammoth Pass	37.6123	-119.032	1715.11	2021-04-01	2021-05-03
		Poison Ridge	37.4028	-119.521	2869.08	2021-04-01	2021-05-03	2022-04-17	2022-04-30	2022-03-17	2023-04-15	2023-01-23	2023-06-24	2023-03-18	2023-05-24
		Tamarack Summit	37.1636	-119.201	1606.3	2021-04-01	2021-05-03	2022-04-17	2022-04-30	2022-03-17	2023-04-15	2023-01-23	2023-06-24	2023-03-18	2023-05-24
		Volcanic Knob	37.3879	-118.905	3474.72						2023-04-15	2023-01-23	2023-06-24	2023-03-18	2023-05-24
	Truckee	Echo Peak	38.849	-120.08	2843.48			2022-04-09	2022-03-11	2022-05-14	2023-04-09	2023-06-10	2023-05-12
		Fallen Leaf	38.934	-120.055	2067.15			2022-04-09	2022-03-11	2022-05-14	2023-04-09	2023-06-10	2023-05-12
		Hagans Meadow	38.8519	-119.937	1979.98			2022-04-09	2022-03-11	2022-05-14	2023-04-09	2023-06-10	2023-05-12
		Heavenly Valley	38.9243	-119.916	1942.42			2022-04-09	2022-03-11	2022-05-14	2023-04-09	2023-06-10	2023-05-12
		Independence Camp	39.4527	-120.294	3180.44			2022-04-09	2022-03-11	2022-05-14	2023-04-09	2023-06-10	2023-05-12
		Independence Creek	39.49	-120.282	2552.09			2022-04-09	2022-03-11	2022-05-14	2023-04-09	2023-06-10	2023-05-12
		Independence Lake	39.4275	-120.313	3114.45			2022-04-09	2022-03-11	2022-05-14	2023-04-09	2023-06-10	2023-05-12
		Marlette Lake	39.1639	-119.897	2548.43			2022-04-09	2022-05-14		2023-06-10	2023-05-12
		Mount Rose Ski Area	39.3157	-119.895	2011.68			2022-04-09	2022-03-11	2022-05-14	2023-04-09	2023-06-10	2023-05-12
		Rubicon #2	38.9993	-120.131	3019.65			2022-04-09	2022-03-11	2022-05-14	2023-04-09	2023-06-10	2023-05-12
		Squaw Valley G.C.	39.1899	-120.266	2791.46			2022-04-09	2022-03-11	2022-05-14	2023-04-09	2023-06-10	2023-05-12
		Tahoe City Cross	39.1715	-120.155	3154.38			2022-04-09	2022-03-11	2022-05-14	2023-04-09	2023-06-10	2023-05-12
		Truckee #2	39.3009	-120.184	3037.88			2022-04-09	2022-03-11	2022-05-14	2023-04-09	2023-06-10	2023-05-12
		Ward Creek #3	39.1354	-120.219	3085.49			2022-04-09	2022-03-11	2022-05-14	2023-04-09	2023-06-10	2023-05-12
	Tuolumne	Dana Meadows	37.8962	-119.257	2305.37	2021-02-25	2021-04-29	2022-04-29	2022-04-05	2022-05-18	2023-04-27	2023-01-25	2023-06-02	2023-06-27	2023-03-03	2023-03-17
		Gin Flat	37.7669	-119.775	2318	2021-02-25	2021-04-29	2022-04-29	2022-04-05	2022-05-18	2023-04-27	2023-01-25	2023-06-02	2023-03-03	2023-03-17
		Slide Canyon	38.0912	-119.432	1961.39			2022-04-29	2022-04-05	2022-05-18
		Tioga Pass Entry Station	37.9109	-119.259	3118.93	2021-02-25	2021-04-29
		Tuolumne Meadows	37.8764	-119.348	2490.78	2021-02-25	2021-04-29	2022-04-29	2022-04-05	2022-05-18
		White Wolf	37.8594	-119.652	2773.68	2021-02-25	2021-04-29	2022-04-29	2022-05-18
	Yuba	Css Lab	39.3256	-120.368	2362.2			2022-03-25	2022-05-15		2023-04-05	2023-04-26	2023-01-28	2023-06-25	2023-06-01
		Meadow Lake	39.4058	-120.506	2346.96			2022-03-25	2022-05-15		2023-04-26	2023-01-28	2023-06-25	2023-06-01
		Robinson Cow Camp	39.622	-120.68	2400.3			2022-03-25	2022-05-15		2023-04-05	2023-04-26	2023-01-28	2023-06-25	2023-06-01
	* The snow stations which were discarded because their locations could not be verified are: Pascoes, Bishop Pass, Tunnel Guard Station, and West Woodchuck Meadow
